# Supplementary material for: Association of anti-tuberculosis drug concentrations in hair and treatment outcomes in MDR- and XDR-TB
Source: PubMed Central journal article supplement — ERJ Open Res. 2019 Apr 26;5(2):00046-2019. doi: 10.1183/23120541.00046-2019 (PMC6484095; doi:10.1183/23120541.00046-2019), 2019-04-26
Supplement: 00046-2019_supplemental_table.pdf [file 00046-2019_supplemental_table.pdf]

**Supplemental Table. All Two-predictor Proportional Hazards Models Assessed for Association of Hair Drug Concentrations and Time to Failure**

| Predictors       | N  | Events | HR   | HR low-CI | HR high-CI | P-value |
|------------------|----|--------|------|-----------|------------|---------|
| <b>Model 1</b>   |    |        |      |           |            |         |
| Mean Z-score     | 47 | 11     | 0.75 | 0.22      | 2.6        | 0.64    |
| Mean-Z x months  |    |        | 0.94 | 0.71      | 1.22       | 0.63    |
| <b>Model 2</b>   |    |        |      |           |            |         |
| Mean Z-score     | 47 | 11     | 0.68 | 0.28      | 1.6        | 0.37    |
| Age              |    |        | 0.68 | 0.31      | 1.50       | 0.34    |
| <b>Model 3</b>   |    |        |      |           |            |         |
| Mean Z-score     | 47 | 11     | 0.53 | 0.25      | 1.14       | 0.11    |
| HIV              |    |        | 3.9  | 0.83      | 18.2       | 0.085   |
| <b>Model 4</b>   |    |        |      |           |            |         |
| Mean Z-score     | 47 | 11     | 0.62 | 0.27      | 1.44       | 0.27    |
| On PAS           |    |        | 1.23 | 0.36      | 4.2        | 0.74    |
| <b>Model 5</b>   |    |        |      |           |            |         |
| Mean Z-score     | 47 | 11     | 0.60 | 0.27      | 1.33       | 0.21    |
| On injectable    |    |        | 1.10 | 0.33      | 3.7        | 0.87    |
| <b>Model 6</b>   |    |        |      |           |            |         |
| Mean Z-score     | 47 | 11     | 0.71 | 0.31      | 1.7        | 0.43    |
| On TZD           |    |        | 2.9  | 0.60      | 14.2       | 0.18    |
| <b>Model 7</b>   |    |        |      |           |            |         |
| Mean Z-score 5   | 47 | 11     | 0.87 | 0.20      | 3.8        | 0.85    |
| Mean-Z5 x months |    |        | 0.96 | 0.65      | 1.43       | 0.85    |
| <b>Model 8</b>   |    |        |      |           |            |         |
| Mean Z-score 5   | 47 | 11     | 0.84 | 0.37      | 1.9        | 0.67    |
| Age              |    |        | 0.63 | 0.29      | 1.37       | 0.24    |
| <b>Model 9</b>   |    |        |      |           |            |         |
| Mean Z-score 5   | 47 | 11     | 0.71 | 0.36      | 1.41       | 0.33    |
| HIV              |    |        | 3.5  | 0.74      | 16.1       | 0.11    |
| <b>Model 10</b>  |    |        |      |           |            |         |
| Mean Z-score 5   | 47 | 11     | 0.82 | 0.37      | 1.8        | 0.61    |
| On PAS           |    |        | 1.38 | 0.40      | 4.8        | 0.61    |
| <b>Model 11</b>  |    |        |      |           |            |         |
| Mean Z-score 5   | 47 | 11     | 0.75 | 0.35      | 1.6        | 0.47    |
| On injectable    |    |        | 1.14 | 0.33      | 3.9        | 0.84    |
| <b>Model 12</b>  |    |        |      |           |            |         |
| Mean Z-score 5   | 47 | 11     | 0.90 | 0.42      | 1.9        | 0.77    |
| On TZD           |    |        | 3.3  | 0.69      | 15.8       | 0.14    |
| <b>Model 13</b>  |    |        |      |           |            |         |
| PZA              | 44 | 11     | 0.77 | 0.51      | 1.15       | 0.20    |
| Age              |    |        | 0.66 | 0.29      | 1.50       | 0.32    |
| <b>Model 14</b>  |    |        |      |           |            |         |
| PZA              | 44 | 11     | 0.69 | 0.46      | 1.03       | 0.071   |
| HIV              |    |        | 3.3  | 0.70      | 15.6       | 0.13    |
| <b>Model 15</b>  |    |        |      |           |            |         |
| PZA              | 44 | 11     | 0.74 | 0.50      | 1.10       | 0.13    |
| On PAS           |    |        | 1.24 | 0.36      | 4.4        | 0.73    |
| <b>Model 16</b>  |    |        |      |           |            |         |
| PZA              | 44 | 11     | 0.72 | 0.49      | 1.06       | 0.092   |
| On injectable    |    |        | 0.93 | 0.28      | 3.1        | 0.90    |
| <b>Model 17</b>  |    |        |      |           |            |         |
| PZA              | 44 | 11     | 0.79 | 0.53      | 1.16       | 0.23    |

| Predictors    | N  | Events | HR   | HR low-CI | HR high-CI | P-value |
|---------------|----|--------|------|-----------|------------|---------|
| On TZD        |    |        | 2.8  | 0.58      | 13.9       | 0.20    |
| Model 18      |    |        |      |           |            |         |
| CFZ           | 31 | 8      | 0.66 | 0.41      | 1.06       | 0.083   |
| Age           |    |        | 0.76 | 0.32      | 1.8        | 0.54    |
| Model 19      |    |        |      |           |            |         |
| CFZ           | 31 | 8      | 0.73 | 0.48      | 1.11       | 0.14    |
| HIV           |    |        | 2.5  | 0.47      | 12.9       | 0.28    |
| Model 20      |    |        |      |           |            |         |
| CFZ           | 31 | 8      | 0.67 | 0.41      | 1.10       | 0.11    |
| On PAS        |    |        | 0.87 | 0.16      | 4.7        | 0.87    |
| Model 21      |    |        |      |           |            |         |
| CFZ           | 31 | 8      | 0.70 | 0.46      | 1.09       | 0.11    |
| On injectable |    |        | 0.67 | 0.13      | 3.6        | 0.64    |
| Model 22      |    |        |      |           |            |         |
| CFZ           | 31 | 8      | 0.76 | 0.48      | 1.21       | 0.25    |
| On TZD        |    |        | 3.3  | 0.36      | 30         | 0.29    |

*Abbreviations:* HR, hazard ratio; CI, confidence interval; PZA, pyrazinamide; CFZ, clofazimine; PAS, para-amino salicylic acid; TZD, terizidone.

All tested two-predictor models, including each individual covariate defined *a priori*, are presented here. Estimated hazard ratios per one standard deviation increase in the predictor score or drug concentration are presented; hazard ratio for age was estimated per 10-year interval. The primary predictor (mean z-score) was derived as follows: participant-level mean Z-scores were derived via calculation of a Z-score for each hair concentration, and subsequently averaging those Z-scores across all relevant drugs for a given participant. Because INH, PZA, and CLZ concentrations were strongly right-skewed, they were logarithmically transformed before Z-score calculation. Because of potential greater efficacy in the setting of MDR-TB, a secondary predictor combining only BDQ, LZD, MFX, LFX, and CFZ ('mean Z-score 5'). We also examined a possible interaction of mean z-score with the time since last regimen change, with regimen change defined as starting two or more new drugs on the same day or on two consecutive days; this definition did not count re-starting drugs that had previously been taken. "On [drug X]" indicates that a patient was taking the drug at the time of hair sampling.
